# Supplementary material for: Exploring sustainable care pathways.
Source: Research Square preprint supplement (doi:10.21203/rs.3.rs-1649821/v2), 2022-07-20
Supplement: Supplementary file 1 [file 7ca409cfb254356fe00caf91.docx]

| 1: Allan et al.,  (2020). UK.  2: Allen et al., (2009).UK.  3: Amaral et al., (2018). Brazil. | To synthesize the available literature on pathways of care in At Risk Mental States or prodromal psychosis, an investigate the barriers and facilitators to receiving care for ARMS.  Identify the effectiveness of care pathways in mental health settings presented in a narrative way.  Explorative systematic review to highlight evidence for each pathway stage. | Included English studies publish between 1985 and 2019, and the study described or related to pathways to care.  Systematic review of seven randomized controlled trials published 1980-2008. Using flow chart and RCT method.  The review synthesized narrative for the 25 studies ranging from 1999 to 2017. | The CINAHL Complete, EMBASE, Medline Complete, PsycINFO and PubMed databases were searched.  Using Medline, CINAHL, Cochrane. Use three stages strategy and three stages filtering process.  LILACS; MEDLINE; SCIELO databases used to searched for paper. 25 studies included.  9 quantitative and 14 qualitative and two mixed methods. | Reported data came exclusively from an ARMS population.  Seven studies from different countries with adult and child in mental health. English, Germany, and French translation was available.  In all 25 studies were from Brazil. Both patients and health personnel views were included. | Mental health professionals, and general practitioners played a key role in help seeking. Family involvement was also found to be an important factor.  Care pathways are most effective in patients with predictable managing of mental symptoms to support proactive management and is more uncertain when including patients with more uncertainty in behavior. Pathways of care could also improve documentation, communication, and change professionals´ behavior in desired direction.  Complex social networks were involved in the studies and the points of first contact varied. A high proportion of patients is treated in specialized services and there is a stressing lack of integration between emergency, hospital and community. |
| --- | --- | --- | --- | --- | --- |
| 4 : Anderson et al., (2010). Canada.  5 : Chen et al.,  (2015). Canada.  6: Deneckere et al.  (2012). Belgium.  7: Doody et al.  (2017). Ireland.  8: Durbin et al.  (2012). Canada.    9: Gronholm et al., (2017).  UK/Australia  10: Mutschler et al., (2019).  Canada/USA/UK  11: Neame et al (2019). UK.  12: Rotter et al.  (2010).  Cochrane/  Germany  13: Storm et al., (2019).  Norwegian /USA  14: Viggiano et al., (2012). USA  15: Vigod et al., (2013). UK.  16: Volpe et al., (2015). Romania. | Examine the associations between pathways of care and sex, socio economic and ethnical determinants of pathway, and duration of untreated psychosis as well as help-seeking behavior.  Evidence to improve quality and efficiency of care for patients with schizophrenia  Explore the relationship between effectiveness and how care pathways promote teamwork.  Identify families’ experiences  of care planning involvement  in adult mental health services.  To get evidence on the quality of information transfer between primary care physician (PCP/GP) and specialist mental health providers for referral requests and after inpatient discharge.  Examine stigma related influences on pathways of care in each stage of the pathway in first episode psychosis.  To capture and consolidate the current understanding of the experiences of individuals post-discharge who are transitioning back into their communities.  Explore the effects of implementation of health information technologies in care pathways.  To assess the effect of clinical pathways on professional practice, patient outcomes, length of stay and hospital costs.  Examine effective coordination between levels of care, challenges in providing continuity of care and quality of life in the transition process.  To provide an overview of current care transition intervention frameworks and models, and to identify components suited for more effectively managing transitions among persons with mental illness.  To describe and evaluate interventions applied during the  transition from in-patient to out-patient care in preventing  early psychiatric readmission.  Comparison of mental health pathways in 23 different countries around the world. | Systematic review with inclusion of 30 papers from 1985 and 2009 in 16 countries, with both quantitative and qualitative design.  Scoping review methods following PRISMA guidelines. Metanalysis not being done due to differences in methods in the papers.  Systematic review  with inclusion of 26  relevant studies.  Review was guided by a framework which is a methodological approach allowing for concurrent synthesis of qualitative and quantitative research methods  A scoping interview of the literature was conducted to generally explore evidence of information exchange between GPs and specialists.  Review which included quantitative, qualitative and mixed methods studies from 1996 and 2016.  Systematic review. Both quantitative and qualitative design is included.  Systematic review with inclusion of 44 papers  Systematic literature search, following PRISMA.  Randomized controlled trials, controlled clinical trials, controlled before and after studies and interrupted time series studies comparing alone in clinical pathways with usual care as well as clinical pathways as part of a multifaceted intervention with usual care.  Scoping review design followed Arkey & O`Malley´s (2005) five-stage framework.  A review of intervention models identified multiple models.  Systematic review of 15 paper about transitional interventions among adults admitted to hospital with mental illness where the study. outcome was psychiatric readmission.  Due to different instruments and gathering of data, the planned comparison could only be performed at a few variables. PRISMA. | Using Medline, HealthStar, EMBASE, PsycINFO databases. Then manual search in 15 journals.  Paper from MEDLINE, PsycINFO, Health Star, EBM Review Cochrane Database. 7 focused on describing process-related data and 6 examined clinical outcomes.  Systematic literature search strategy in three electronic  databases – MEDLINE, Embase, and CINAHL, combined with Mesh and non-Mesh terms for care pathways and teamwork.    An integrative literature review where electronic databases and grey literature were searched for papers published between 2005 and 2016 from CINAHL, Scopus, Web Science, PsyInfo, MEDLINE, PsyArticles.  Bibliographic academic databases were searched for the period 1995 – 2011 (MEDLINE, Embase, CINAHL, and PSYC INFO Scius and Google Scholar. Org. websides).  CINAHL, EMBASE; Medline, PsycINFO were used. Data synthesis was conducted in three stages. First thematic analyze, was undertaken to synthesize the finding of articles reporting qualitative data. Second narrative synthesis, third stages involved a meta- synthesis.  Systematic literature search, following PRISMA guidelines. Using Medline, PsycINFO, Google Scholar, HealthStar.  Included 27 papers from a variety of countries.  Using Medline, EMBASE, CENTRAL. 94% reported from hospital care and treatment and 6% from community service.  Searched the Database of Abstracts and Reviews of effectiveness (DARE), The Effective Practice and Organization of Care Register, the Cochrane Central Register of Controlled Trials and bibliographic databases including MEDLINE, EMBASE, CINAHL, NHS EED and Global Health.  CINAHL; Cochrane, Medline, PsycInfo, Google scholar was used. Systematic review with inclusion of 16 papers with qualitative and quantitative design.  PubMed, Google scholar, and grouped into two categories. 1.Models that have been put forward and tested in the area of medical care.2. Information about framework, conceptual models or descriptions of care transitions intervention.  Medline, CINAHL, EMBASE, PsycINFO and the Cochrane  Library.  From MELINE, OVID, EMBASE, PSYCINFO. Reference list from 1986 to 2013 with majority of studies from 2005 and newer. | In all 30 studies from Australia, Asia, USA, Africa, Europa. Both patients, relatives and health personnel views were included.  In all 13 papers (Hong Kong, Germany, UK) were included from 1998 to 2014. Inclusion criteria narrowed to people suffering from. schizophrenia. Both patients and health personnel views were included.  In all 26 studies used the result of an international expert panel on team indicators in care processes to identify search terms.  In all 15 papers from UK, USA, Sweden, Norway, Italy, Israel met the inclusion criteria.  Thematic analysis generated three themes.  In all 32 paper and the librarian also explored the gray literature using sources suggested by the Cochrane Collaboration, were searched.  In all 40 studies. Both patients and health personnel views were included. People aged up to and including 40 years.  In all 27 paper were included. 18 quantitative and 9 qualitative papers. Only patient perspectives.  All papers lacking patients´ experiences were excluded.  44 paper focused on health technology Electronic documentation. 16 were before-and-after studies,14 was noncomparative, 5 were interrupted time series studies, 4 were retrospective cohort studies, 2 were cluster randomized controlled trials, and there were 1 each of controlled before-after, prospective case-control, and prospective cohort studies.  In all 28 studies included. Two review authors independently screened all titles to assess eligibility and methodological quality. Studies were grouped into those comparing clinical pathways with usual care and those comparing clinical pathways as a part of a multifaceted intervention with usual care.  In all 16 paper. Both patients and health personnel views were included. Paper from USA, Japan, UK. Individual with mental illness >8 years old.  In all nine papers about transitions from hospital to outpatient care. Managing transitions among persons with SMI.  I all 15 papers about transition  from in-patient to out-patient care in reducing early psychiatric  readmission among adults with mental illness.  A global perspective of 34 papers on psychiatric pathway. Both patients and health personnel views were included. Studies from different country and continent. | Found that the first contact for patients was a physician, but the referral source was emergency services. They did not find consistent results across the studies that explored the sex, socio-economic, and ethnic determinants of the pathway. More research needed to understand disparities between pathways of care and which factors that could increase patients help-seeking behavior.  Finings in three areas: Content, development, effectiveness. Pathways of care show promising results in increasing quality and efficiency for patients with a diagnosis of schizophrenia, but more evidence is needed.  That was frequently mentioned the need for a multidisciplinary approach and educational training sessions. Necessary conditions are a context that support teamwork and to achieve these, each care pathways requires a clearly defined team approach customized to the individual teams ’needs.  1: Families’ experiences and collaboration, 2: families’ perceptions of professionals and 3: families’ impressions of the care planning process. Collaborative decision-making was not regularly experienced by families, lack of communication, confidentiality constraints and a claim of ‘insider knowledge’ of service users. Care planning were perceived to be uncoordinated and their lived experiences not always appreciated.  The study showed variation in the quality of communication between GPs and mental health specialist, although care management inevitably requires collaboration among many providers to meet patients need over time. Patient-centered care, such as explaining the purpose of a consultation request to the patient, need attention, being among the least investigated in the review literature.  Lack of information could result in increased perceived stigma. Patients also perceived devaluations by service providers. Perceived stigma reduction could decrease if treatment were normalized as sell as working with info to environment.  Themes identified as necessary for transition were patient safety, supported autonomy, and activities in the community. Barriers were poverty, interpersonal difficulties and stigma. All pointing to the need of targeting the identified challenges.  Some evidence that health information technology improving objectively measured patient outcome (mortality, patient-reported outcome measures, biochemical markers, and disease activity). More research is needed.  Clinical pathways are associated with reduced in-hospital complications and improved documentation without negatively impacting on length of stay and hospital costs. (Author’s conclusions).  Effective approaches addressed coordination challenges and resulted in better improvements in service utilization, social functioning and quality of life. Shared decision-making support for caregivers and addressing the challenges when patients are need of complicated medication regimes.  A core set of nine care transitions intervention components can stimulate the development of interventions that address transitions in the mental health population more effectively.  Effective transitional intervention components are  feasible and likely to be cost-effective  Our results are consistent with the findings of a previous review of pre-discharge interventions in psychiatry.  Identified referral delay differences between countries with a range from Romania, Cuba, Bangladesh and Albania to 25 weeks before seeing a psychiatrist. Also, the role of a general practitioners could either decrease or increase the referral time. No direct comparison of data concerning the pathway to mental healthcare at the world level, is available yet. |
